# Supplementary material for: Mast-cell driven dermal white adipose tissue remodeling amplifies inflammation and fibrosis in atopic dermatitis
Source: Research Square preprint supplement (doi:10.21203/rs.3.rs-8377256/v1), 2026-01-13
Supplement: Supplementary file 1 [file fa47a7bb58d525631a563e74.pdf]

## **Supplemental Materials and Methods**

### **Chemicals, dyes, Antibodies, and recombinant proteins:**

IBMX, dexamethasone, indomethacin and recombinant human insulin were purchased from Sigma-Aldrich (Burlington, MA, USA). BODIPY 493/503 (lipid dye) was purchased from Thermo Fisher Scientific (Waltham, MA, USA). PHA dye (Rhodamine Phalloidin, actin dye) was purchased from Cytoskeleton (Denver, CO, USA). Zombie Violet (viability dye) was purchased from Biolegend (San Diego, CA, USA). Mouse anti-TPSB2, and goat anti-C/EBP $\delta$  antibodies were purchased from Abcam (Cambridge, UK). Goat anti-F3 (CD142) and goat anti-PDGFR $\alpha$  antibodies were purchased from R&D Systems (Minneapolis, MN, USA). Rabbit anti PLIN1, rabbit anti-TPSB2, rabbit anti-pSMAD2/3 and rabbit anti-pSTAT6 antibodies were purchased from Cell Signaling Technology (Danvers, MA, USA). Mouse anti-Vimentin, rabbit anti-KITL, and rabbit anti-CXCL12 were purchased from Proteintech (Rosemont, IL, USA). Recombinant mouse IL4, recombinant mouse IL13, recombinant mouse TGF $\beta$ , recombinant mouse IL3, recombinant mouse SCF, recombinant human IL4 and recombinant human IL13 were purchased from R&D Systems (Minneapolis, MN, USA). Recombinant human TGF $\beta$  were purchased from PeproTech (Thermo Fisher Scientific, Waltham, MA, USA).

### **Histology, collagen trichrome staining and immunohistochemistry (IHC):**

To prepare paraffin sections, tissue biopsies were fixed in 4% paraformaldehyde (PFA; Alfa Aesar, Shanghai, China) overnight, followed by dehydration, embedding in paraffin, and sectioning at a thickness of 7  $\mu$ m. For frozen sections, fresh dorsal skin tissues were directly embedded in optimal cutting temperature (OCT) compound and sectioned at 18  $\mu$ m.

For histological analysis, frozen sections were first fixed in 4% PFA for 15 minutes before staining. Hematoxylin and Eosin (HE) staining (ZSGB-BIO, China) and Masson's Trichrome staining (Solarbio, China) were performed strictly according to the manufacturers' protocols. Lipid staining on frozen sections was conducted using BODIPY (ThermoFisher Scientific, Waltham, MA, USA) and PHA (Cytoskeleton, Denver, CO, USA) dyes.

For immunohistochemistry (IHC), fixed sections were permeabilized with 0.1% saponin (Sigma-Aldrich, St Louis, MO, USA) and blocked in 5% bovine serum albumin (BSA; Bioforxx, Hessen, Germany). The blocked sections were incubated with primary antibodies at 4°C overnight, then with appropriate secondary antibodies conjugated to Alexa Fluor 488, Cy5, or Cy3 (Jackson ImmunoResearch Laboratories, West Grove, PA, USA) for 1.5 hours at room temperature in the dark. Finally, sections were mounted using ProLong Gold Antifade Mountant containing DAPI (Thermo Scientific Inc., Rockford, IL, USA).

All images were acquired using either the Aperio VERSA Brightfield/Fluorescence Digital Pathology Scanner or the Leica TCS SP8 White Light Laser Confocal Microscope, and processed with Adobe Photoshop and/or Aperio ImageScope software (Leica Biosystems, Germany). Quantification of the integrated fluorescence intensity for each fluorophore was performed using ImageJ software.

### **Flow cytometry and analysis (FACS) and Cell Sorting:**

The FACS procedure for analyzing EtOH- or MC903-treated mouse skin dermal fibroblasts and mast cells was modified from previously established or reported method. Briefly, Viable cells were stained with Zombie Violet™ viability dye (BioLegend, 423114) for 15 minutes at room temperature, following by blocking with anti-mouse CD16/32 (1:100; eBioscience, 14-0161-85). Surface staining employed two parallel panels: (1) Fibroblast characterization panel: FITC-conjugated anti-CD26 (BioLegend, 137806), PE-conjugated anti-Thy1.2 (BioLegend, 105308), BV605-conjugated anti-Ly6A/E (BioLegend, 108133), PE-Cy7-conjugated anti-CD45 (BioLegend, 103114), APC-conjugated anti-PDGFR $\alpha$  (BioLegend, 135910), and PE-conjugated anti-F3 (R&D Systems, FAB3178P). (2) Mast cell profiling panel: PE-Cy7-conjugated anti-CD45 (BioLegend, 103114), PE-conjugated anti-Fc $\epsilon$ R1 $\alpha$  (BioLegend, 134307), and APC-conjugated anti-c-Kit (BioLegend, 135108).

FACS analysis of protein expression for each cell marker was conducted using a Cytotflex LX flow cytometer, with data analyzed via FlowJo V10 software.

For FACS sorting of inflammatory preadipocytes from MC903-treated mouse skin, a Cytotflex SRT machine was used. Immediately after sorting, freshly isolated cells were lysed directly in TRIzol reagent for subsequent qRT-PCR analysis.

### **Quantitative reverse transcription-quantitative PCR (qRT-PCR) analysis:**

Total cellular RNA was extracted using the RNAExpress Total RNA Kit (NCM biotech, Suzhou, China). Reverse transcription of 500 ng RNA to cDNA was performed using the HiScript III RT SuperMix Kit (Vazyme Biotech Co., Ltd., Nanjing, China). Quantitative real-time PCR (qRT-PCR) was conducted on the qTower Real-Time PCR System (Analytik Jena AG, Jena, Germany) using ChamQ Universal SYBR qPCR Master Mix (Vazyme Biotech Co., Ltd., Cat. No. Q711-02).

All primers used with SYBR Green chemistry were designed to span at least one exon-intron junction to avoid nonspecific amplification of genomic DNA. The TATA-box binding protein (*Tbp* / *TBP*) gene was selected as an internal reference to normalize target gene expression levels in mouse samples. Primer sequences are listed in **Supplementary Table S3 and Table S4**.

### **ELISA assay**

Mouse CXCL12, KITL, IL-4, IL-13, and TGF- $\beta$ 1 ELISA kits were purchased from R&D Systems (Minneapolis, MN, USA). Conditioned media (CM) collected from in vitro differentiated mouse dermal preadipocytes or bone marrow-derived mast cells (BMMCs) were assayed for protein concentrations using these kits following the manufacturer's protocols.

### **RNA velocity:**

To reconstruct the lineage commitment trajectories of dermal fibroblasts (dFBs), we performed RNA velocity analysis using the scVelo package (v0.3.3) with default parameters. Briefly, spliced and unspliced mRNA counts were extracted from aligned

BAM files using the velocity algorithm (v0.17.17), enabling the prediction of future transcriptional states based on splicing dynamics. Velocity vectors were computed using steady-state modeling to infer directional cell-state transitions, which were subsequently projected onto the UMAP embedding to visualize dFB lineage trajectories.

#### **Gene-set enrichment scores:**

We quantified functional signatures across dermal fibroblast (dFB) clusters using Seurat's AddModuleScore function. This method calculates cluster-specific enrichment scores by computing the average expression of signature genes per cell and subtracting background expression from randomly selected control features. Inflammatory signature was formed by: *Il6*, *Cxcl1*, *Cxcl12*, *Cxcl13*, *Cxcl14*, *Cxcl2*, *Ccl11*, *Ccl2*, *Ccl7*, *Saa3*, *Kitl*, *Cebpd*, *Il33*. Adipocyte signature was formed by: *Pparg*, *Lpl*, *Fabp4*, *Mest*, *Agt*, *Plin1*, *Plin2*. Preadipocyte signature was formed by: *Kitl*, *Prg4*, *Cxcl12*, *Apoe*, *Apod*, *Cebpb*, *Cebpd*, *Zfp36*, *F3*. Adipocyte progenitor signature was formed by: *Wnt2*, *Smpd3*, *Sfrp2*, *Anxa3*, *Col14a1*, *Pcolce2*, *Plat*, *Fn1*, *Mfap5*. Scores were averaged within all cells from the same cluster and inflammatory or adipogenic region (dFB subsets). This approach enabled systematic comparison of functional states across fibroblast subpopulations.

#### **Pearson Correlation analysis:**

To evaluate transcriptional relationships across systems, we performed Pearson correlation analyses on two complementary datasets: 1. In vitro-in vivo comparison: RNA-seq from *in vitro* adipocyte differentiation versus scRNA-seq of dermal fibroblast (dFB) subclusters from MC903-treated mice; 2. Cross-species analysis: scRNA-seq of dFB subclusters from healthy human skin, human atopic dermatitis (AD) lesions, and MC903-treated mouse skin.

For both analyses, raw transcriptomic data were normalized, transformed into expression matrices, and analyzed using Pearson correlation coefficients. Hierarchical clustering results were visualized as heatmaps in R Studio. This integrated approach revealed conserved and divergent signatures between *in vitro* adipogenesis and *in vivo* dFB states, and species-specific and disease-associated dFB subcluster profiles, offering mechanistic insights into skin pathophysiology.

#### **Cell-chat signaling network analysis:**

To investigate intercellular communication dynamics among dermal fibroblast (dFB) subclusters and their interactions with immune cells during MC903-induced inflammation, we utilized CellChat (version 2.2.0) for computational analysis of scRNA-seq data. This framework enabled systematic characterization of cell-cell signaling by mapping gene expression profiles onto a ligand-receptor pair network, calculating interaction probabilities to predict biologically relevant communication networks and evaluating network centrality to identify key cell populations in specific signaling pathways. The resulting communication networks were visualized through hierarchical graphs and circle plots, providing a multi-dimensional representation of

both individual and coordinated signaling activities.

### **Bulk RNA sequencing and bioinformatic analysis:**

Total RNA was isolated using TRIzol reagent (Vazyme, R401-01-AA) followed by column purification with the RNAExpress Total RNA Kit (NCM biotech, M050). RNA quality was verified using a Bioanalyzer (Agilent Technologies), with only samples exhibiting RNA Integrity Numbers (RIN) >7 proceeding to library preparation. Libraries were constructed using the NEBNext Ultra RNA Library Prep Kit for Illumina, following the manufacturer's protocol. Briefly:

1. mRNA enrichment: Poly(A)<sup>+</sup> RNA was isolated using the NEBNext Poly(A) mRNA Magnetic Isolation Module.
2. cDNA synthesis: Fragmented mRNA underwent first-strand synthesis with ProtoScript II Reverse Transcriptase and random primers, followed by second-strand synthesis using the NEBNext Second Strand Synthesis Enzyme Mix.
3. Library construction: End repair/dA-tailing was performed using the End Prep Enzyme Mix, followed by adapter ligation. Size selection (~420 bp total, ~300 bp insert) was achieved with AxyPrep Mag PCR Clean-up beads (Axygen).
4. Amplification and QC: Libraries were PCR-amplified, purified, and quantified using a Qubit 2.0 Fluorometer (Invitrogen), with size distribution validated on an Agilent 2100 Bioanalyzer.

Multiplexed libraries were sequenced on an Illumina NovaSeq platform (2×150 paired-end). Raw data were processed by GENEWIZ, with downstream analysis including differential gene expression analysis, KEGG and GO pathway enrichment and correlation analysis between single-cell and bulk RNA-seq datasets.

### **Knockdown experiments by siRNA transfection:**

To knockdown *Cxcl12* or *Kitl* expression in differentiating preadipocytes (pAds), the TriFECTa RNAi Kit targeting *Kitl* (Integrated DNA Technologies) and small interfering RNA (siRNA) against *Cxcl12* (JTS Scientific) were used. These RNAi reagents (targeting *Cxcl12* or *Kitl*) were transfected into differentiating pAds using Lipofectamine RNAiMAX (Invitrogen, 13778030). At 48 hours post-dsiRNA transfection, conditioned medium (CM) was collected separately from each treatment group for use in co-culture assays or ELISA analyses. Meanwhile, the differentiating pAds were harvested for qRT-PCR analysis to assess knockdown efficiency.

The sequences targeting *Kitl* were as follows:

**si-Kitl#1:** sense sequence: 5'-CUA UUCUGUACGCAUUGUUGAAGAA-3', antisense sequence: 5'-UUCUUCAACAAUGCGUACAGAAUAGCU-3'.

**si-Kitl#2:** sense sequence: 5'-CAUUGUUGGCUACGAGAUUUGGUA-3', antisense sequence: 5'-UUACCAUAUCUCGUAGCCAACAAUGAC-3'.

**si-Kitl#3:** sense sequence: 5'-GAUAAUGUAAAAGACAUUACAAAAC-3', antisense sequence: 5'-GUUUUGUAAUGUCUUUUACAUUAUCAG-3'.

The sequences targeting *Cxcl12* were as follows:

**si-Cxcl12#1:** sense sequence: 5'-GAAGAACAACAACAGACAAGUTT-3', antisense sequence: 5'-ACUUGUCUGUUGUUGUUCUUCTT-3'.



**si-Cxcl12#2:** sense sequence: 5'- CUGCAUCAGUGACGGUAAACCTT-3', antisense sequence: 5'- GGUUUACCGUCACUGAUGCAGTT-3'.

**si-Cxcl12#3:** sense sequence: 5'- GAUCCAAGAGUACCUGGAGAATT-3', antisense sequence: 5'- UUCUCCAGGUACUCUUGGAUUCTT-3'.

### **Isolation and In Vitro Culture of Bone Marrow-Derived Mast Cells:**

To isolate mast cells, bone marrow cells were first flushed from the femurs and tibias of mice using RPMI-1640 medium supplemented with 10% fetal bovine serum (FBS). The harvested bone marrow cells were treated with red blood cell lysis buffer, followed by a single wash with phosphate-buffered saline (PBS).

For in vitro culture, the isolated cells were maintained in RPMI-1640 medium containing the following supplements: 1x antibiotics/antimycotics, 1 mM sodium pyruvate, 1x nonessential amino acids solution, 10% (v/v) FBS, 10 ng/ml recombinant mouse interleukin-3 (IL-3), and 10 ng/ml recombinant mouse stem cell factor (SCF). After 4 weeks of culture, FACS analysis confirmed that >95% of the cells were mast cells (MCs) expressing c-Kit and FcεRIα (c-Kit<sup>+</sup> FcεRIα<sup>+</sup>).

### **Co-Culture of Mast Cells with Conditioned Medium Derived from Inflammatory Preadipocytes:**

For direct co-culture experiments, mast cells were treated with a 1:1 mixture of inflammatory preadipocyte-conditioned medium (inf.pAd-CM) and mast cell culture medium for 48 hours. At specified time points, mast cells or their conditioned medium (CM) were harvested for qRT-PCR and ELISA analyses. Supernatants were centrifuged to remove cellular debris, and the resulting clarified fluid was collected as CM.

### **Quantification and statistical analysis**

All experiments were repeated independently at least three times, yielding similar results. Statistical analyses were performed using GraphPad Prism software (version 9.0.0). Immunofluorescence intensity quantification was conducted using ImageJ software (version 1.53). Specifically, integrated density values for each fluorophore were measured within defined regions of interest (ROIs) across epidermal and dermal layers of skin sections. Intensity profiles depicting fluorescence signals along the epidermis-dermis axis (from top to bottom) were generated using established methods adapted from prior publications.

Statistical significance between two experimental conditions was determined using Student's unpaired two-tailed t-test, while one-way analysis of variance (ANOVA) with Tukey's post hoc test was applied for multiple group comparisons. Probability (P) values <0.05 were considered statistically significant, with significance levels denoted as \*P<0.05, \*\*P<0.01, \*\*\*P<0.001, and \*\*\*\*P<0.0001. Data are presented as mean ± standard error of the mean (SEM).



## FIGURE S1. Spatiotemporal coupling of adipocyte lipolysis and dedifferentiation to mast cell activation and fibrotic remodeling during AD pathogenesis

- (A-B) Formalin-fixed, paraffin-embedded human biopsies (healthy control/HC and atopic dermatitis lesional) were sectioned and immunostained for TPSB2 (red) and DAPI (white) as indicated. White dotted-lines mark the boarder between the dermis and epidermis and yellow dotted-lines mark the fibrotic area enriched with TPSB2<sup>+</sup> mast cells and collagen bundles (see Fig. 1C). Scale bars, 400  $\mu$ m.
- (B) Quantified results showing relative TPSB AFI (artificial fluorescent intensity) (n $\sim$ 20 areas/group).
- (C-D) Mouse back skin were applied topically with MC903 everyday for upto 10 days to induced AD-like skin inflammation. Macroscopic images (C) and quantified Atopic Dermatitis Severity Index (EASI) scores (D) showing the development of skin lesions overtime.
- (E) qRT-PCR analysis of the mRNA expression of *Tslp*, *Il4*, *Il13* in mouse skin (n=4/group).
- (F) qRT-PCR analysis of the mRNA expression of *Il4*, *Il13* in skin-draining lymph nodes (n=4/group).
- (G) Quantified bar graph showing the percentage of degranulated mast cells (Fig. 1F) in dWAT.
- (H) qRT-PCR analysis of the mRNA expression of *Tpsb2* in mouse skin (n=4/group).
- (I-J) FACS plots (I) showing the percentage of mast cells (KIT<sup>+</sup>FCER1A<sup>+</sup>) in total skin cells isolated from control or MC903-treated skin samples as indicated (representative of n= 3/group). (J) Quantified bar graphs showing the percentage of KIT<sup>+</sup>FCER1A<sup>+</sup> mast cells in total cells (n = 3/group).
- (K-L) Representative Hematoxylin-Eosin (H&E) staining of control or MC903-treated mouse skin samples. Zoom-in images of dWAT are shown on the lower panel. (L) Quantified bar graphs showing dWAT cell #/mm<sup>2</sup> area or dWAT thickness as indicated (n=8~9/group).
- (M) qRT-PCR analysis of the mRNA expression of *Adipoq* in mouse skin (n=4/group).
- (N) Adipoq-CreERT2;mTmG mice were injected with tamoxifen, treated with MC903 and dorsal skin was analyzed by FACS analysis as shown in Fig. 1P. Quantified bar graphs showing the percentage of GFP<sup>+</sup> PDGFRA<sup>+</sup> Ly6A<sup>+</sup> preadipocytes (pAds) in total cells (n = 3/group).
- (O) Proposed model depicting the temporal evolution of MC903-induced AD-like inflammation: dWAT thickness rapidly declines (lipolysis), mast-cell infiltration and activation rises, followed by progressive accumulation of dermal collagen (fibrosis).

All error bars indicate mean  $\pm$  SEM. \*p < 0.05, \*\*p < 0.01, \*\*\*p < 0.001, \*\*\*\*p < 0.0001.

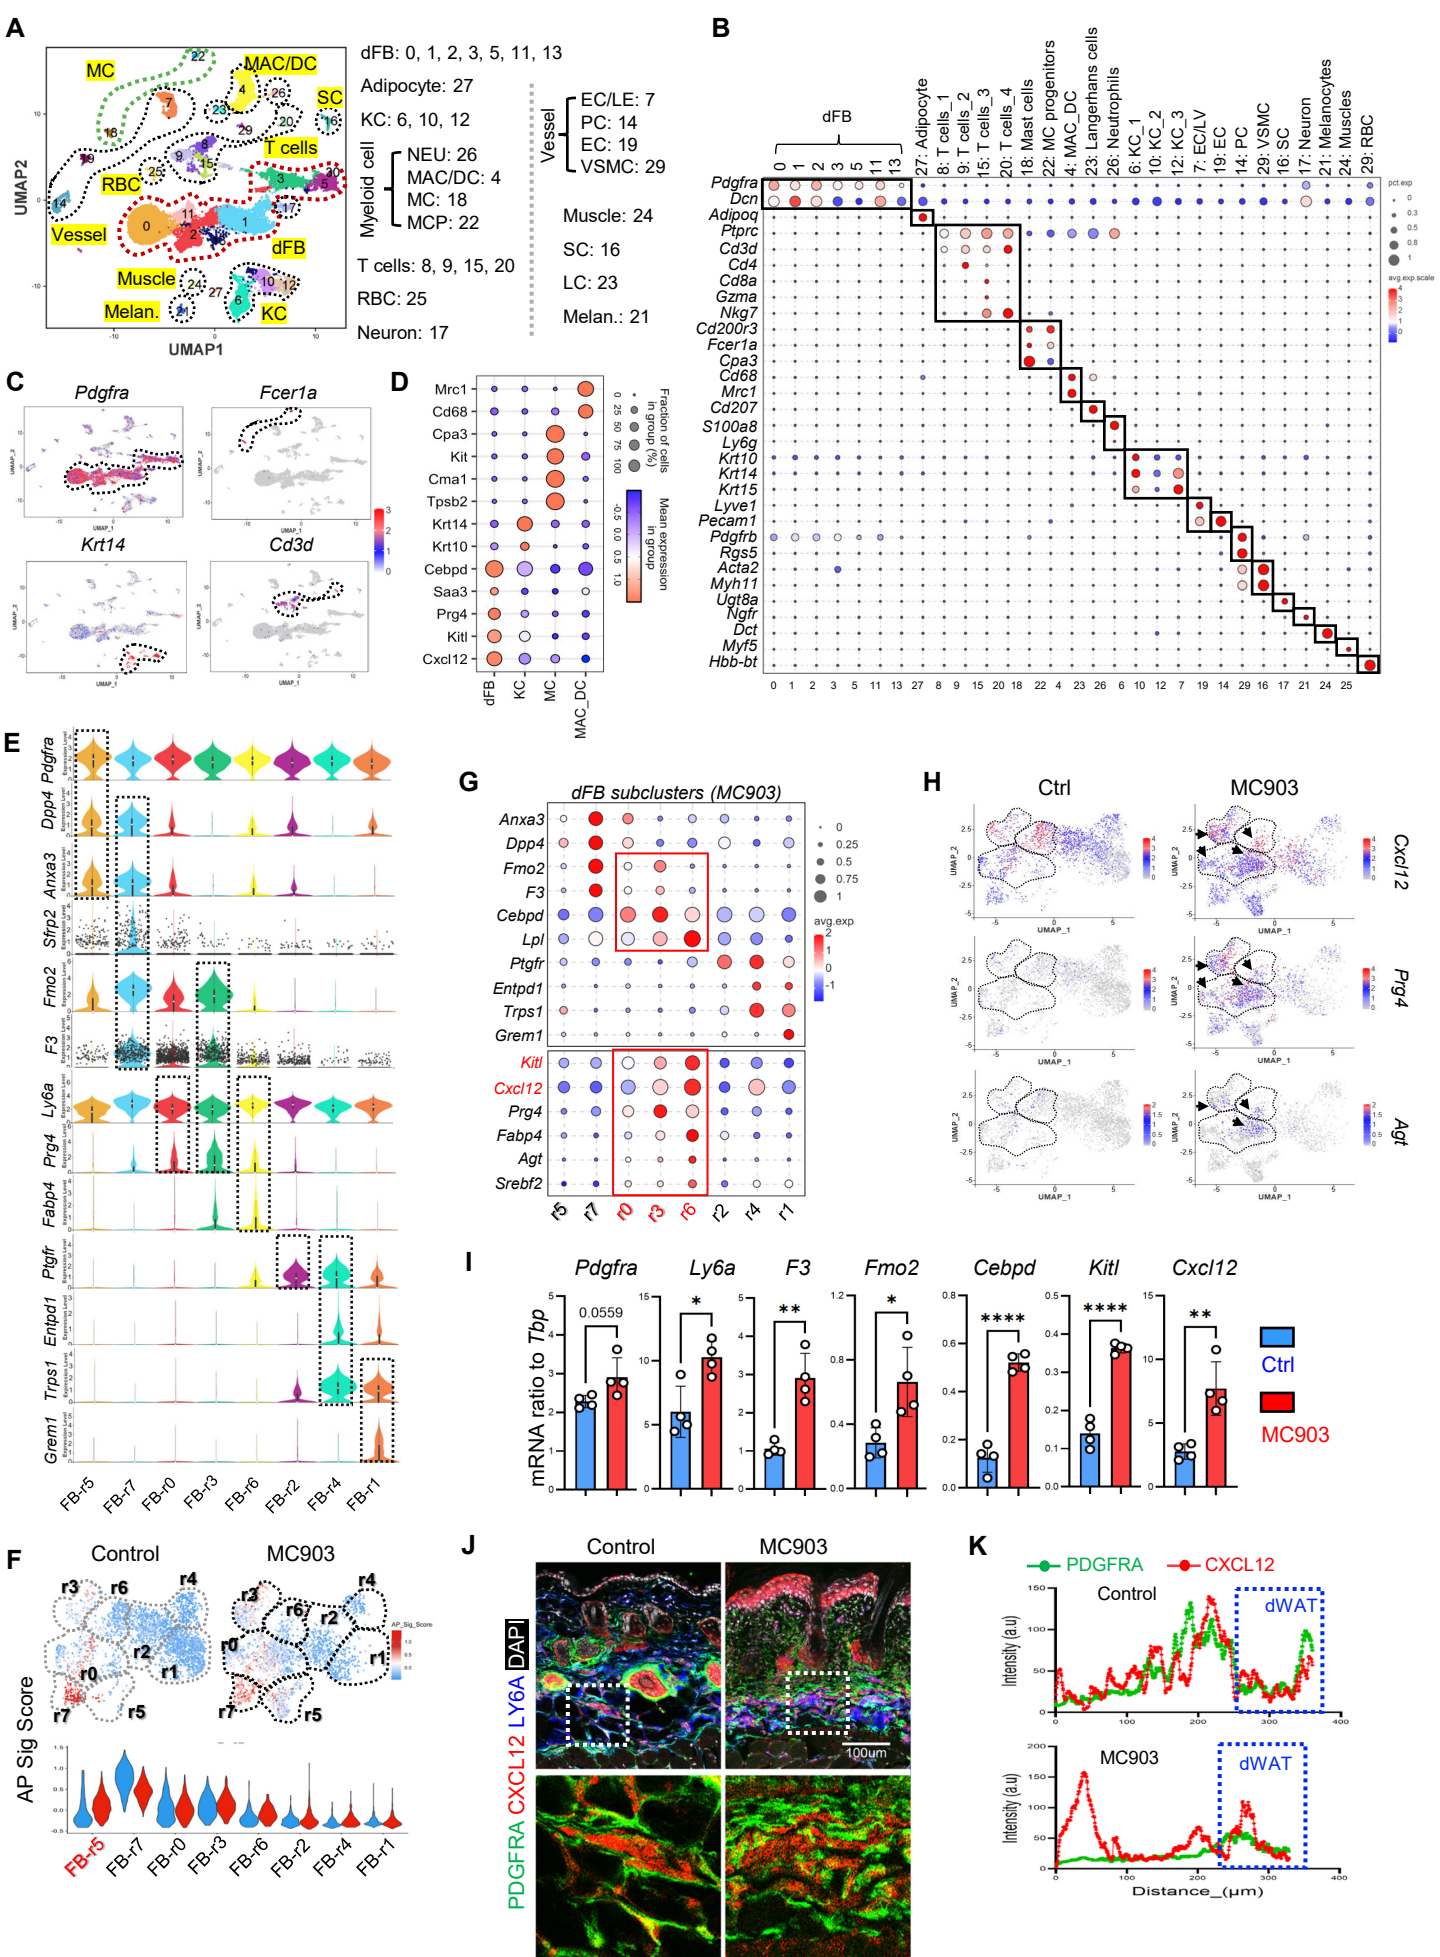

FIGURE S2

**FIGURE S2. Defining the dermal immune landscape of *Pdgfra*<sup>+</sup> fibroblast subsets by scRNA-seq**

**(A-D)** ScRNA-seq analysis of total skin cells from Ctrl and MC903-induced mice. **(A)** UMAP projection of all skin cells, showing cell distribution by clusters. The identify for each cell cluster is shown on the right panel. Abbreviations: dFB, dermal fibroblasts; KC, keratinocytes; NEU, neutrophils; MAC, macrophages; MC, mast cells; MCP, mast cell progenitors; RBC, red blood cells; EC, endothelial cells; LV, lymphatic vessel; VSMC, vascular smooth muscle cells; SC, Schwann cells; Melan, melanocytes. **(B)** Bubble plots showing marker gene expression for each cell cluster. **(C)** UMAP plots showing the expression of *Pdgfra* (dFB marker), *Krt14* (KC marker), *Fcer1a* (MC marker), and *Cd3d* (T cell marker). **(D)** Bubble plots showing the differentially expressed genes in dFBs, KC, MC, and MAC\_DC cell populations.

**(E-H)** PDGFRA<sup>+</sup> dFBs were re-clustered into 8 sub-clusters as shown in Fig. 2D-E. **(E)** Violin plots showing the expression of indicated marker genes for each dFB cluster. **(F)** Signature score distribution shown on UMAP and violin plots for adipocyte progenitor (AP) gene signature. **(G)** Bubble plots showing the differential expressed genes in various *Pdgfra*<sup>+</sup> dFB clusters in MC903-treated skin samples. **(H)** UMAP plots showing the expression of indicated genes in control and MC903 skin samples.

**(I)** qRT-PCR analysis of indicated genes in control or MC903-treated skin samples (n=4/group). All error bars indicate mean  $\pm$  SEM. \*p < 0.05, \*\*p < 0.01, \*\*\*\*p < 0.0001.

**(J-K)** Immunostaining of CXCL12 (red), Ly6A (blue), PDGFRA (green) and DAPI (white) in control or MC903-treated skin samples. Scale bar, 100  $\mu$ m. Quantified fluorescence intensity profiles of PDGFRA (green) and CXCL12 (red) measured from the epidermis through dWAT.



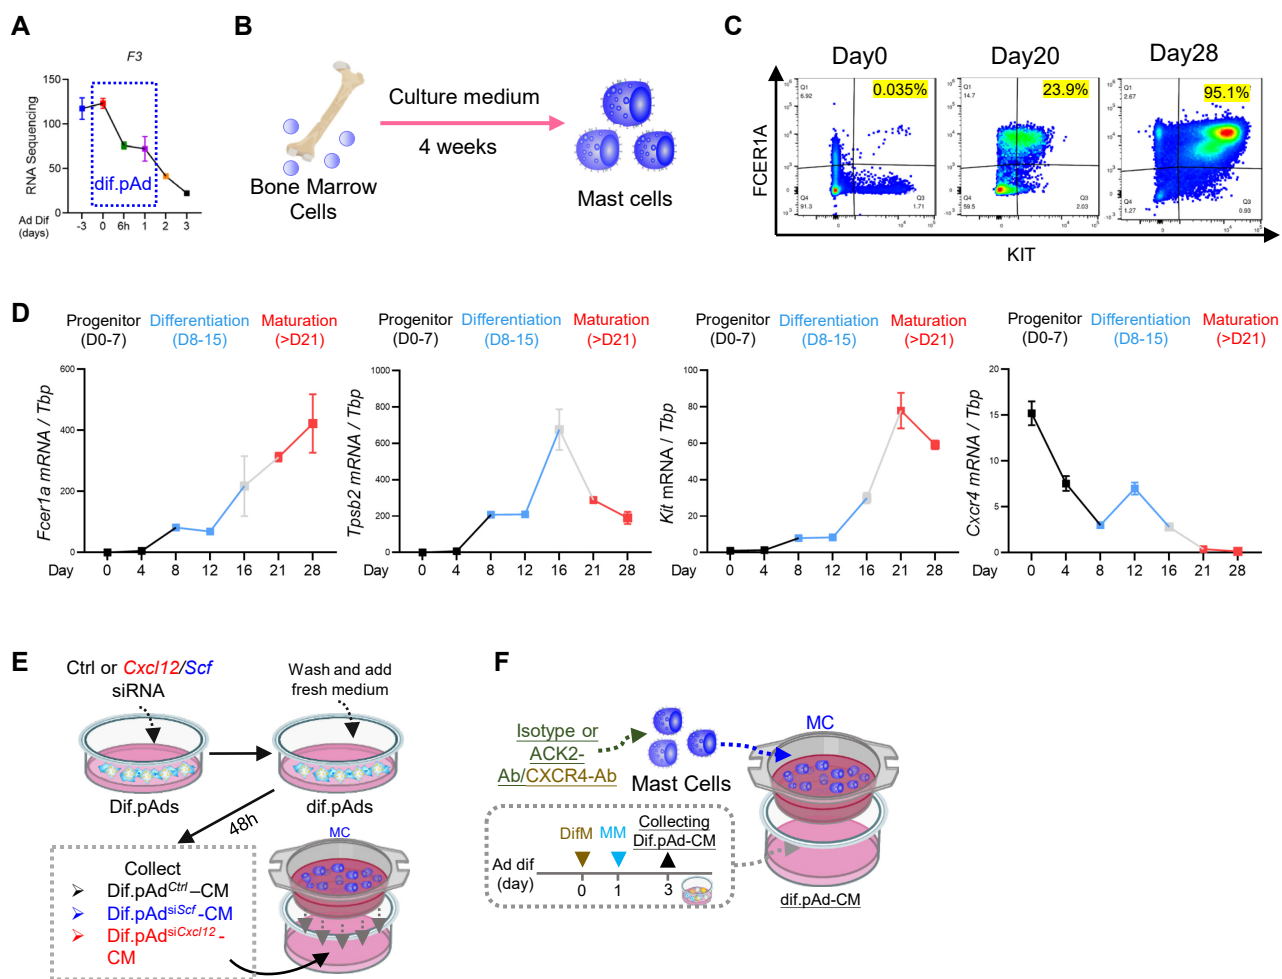

**FIGURE S3. Inflammatory pAds are the dominant cellular source of the MC chemoattractants SCF and CXCL12 in AD skin.**

(A) Line chart showing the mRNA expression kinetics of *F3* during in vitro adipocyte differentiation course.

(B-D) Schematic diagram (B) for in vitro mast cell culture and FACS plot showing the percentage of mast cells (KIT+FCER1A+) in total viable cells (C). (D) qRT-PCR analysis of mRNA expression levels of indicated genes during in vitro mast cell culture.

(E) Schematic diagram showing the strategy to establish the co-culture system between bone-marrow derived MCs and dif. pAd transfected with dsRNA against Scf or Cxcl12 in a transwell system.

(F) Schematic diagram showing the strategy to establish the transwell system between dif. pAd-CM and bone-marrow derived MCs pretreated with neutralizing antibody against ACK2 or CXCR4 neutralizing antibody.

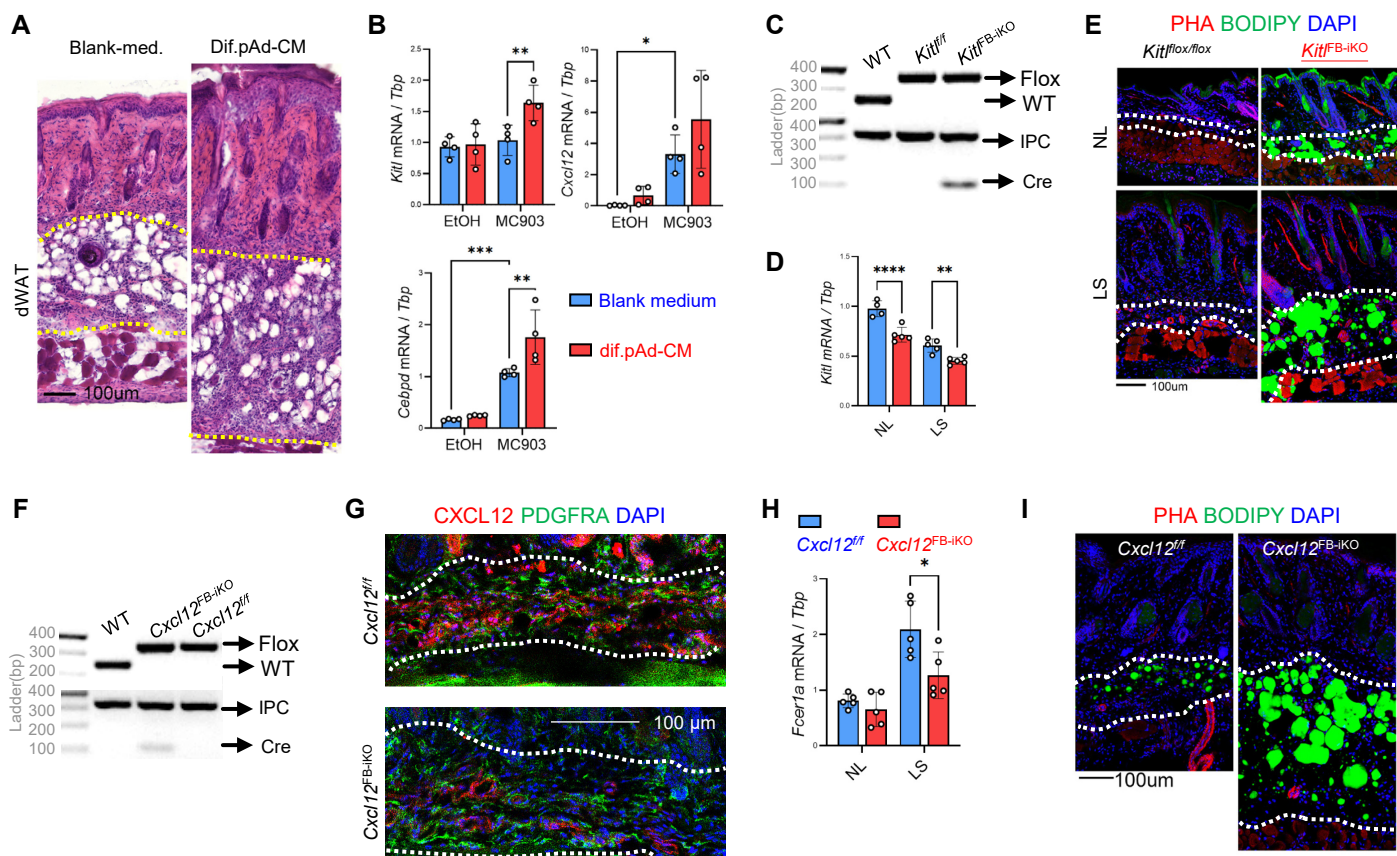

**FIGURE S4. Fibroblast-specific ablation of *Kitl* or *Cxcl12* abolishes mast cell influx and fibrosis in dWAT during AD pathogenesis**

(A-B) Mice undergoing daily MC903 treatment received intradermal injections of control or dif. pAd\_CM as indicated in Fig. 4A, and skin samples were collected at day 6 of treatment for analysis. (A) Representative HE staining images. (B) qRT-PCR analysis of indicated genes (n=4/group).

(C-E) The inducible fibroblast-specific *Kitl* mice (*Kitl*<sup>fl/fl</sup>; *Pdgfra*-Cre/ERT, *Kitl*<sup>FB-ikO</sup>) were injected i.p. with TAM during the MC903 application course. (C) Multiplex-PCR based genotyping using allele specific primers yields DNA products having sizes specific for the wild-type and *Kitl*-floxed alleles. Lower gel shows gene products for Cre and/or internal product control (IPC) as indicated. (D) qRT-PCR analysis of *Kitl* (n=5/group). (E) Skin sections were stained with bodipy (green), PHA (red), and DAPI (blue). The dotted lines mark dWAT layer. Scale bars, 100 μm.

(F-I) The inducible fibroblast-specific *Cxcl12* mice (*Cxcl12*<sup>fl/fl</sup>; *Pdgfra*-Cre/ERT, *Cxcl12*<sup>FB-ikO</sup>) were injected i.p. with TAM during the MC903 application course. (F) Multiplex-PCR based genotyping using allele specific primers yields DNA products having sizes specific for the wild-type and *Cxcl12*-floxed alleles. Lower gel shows gene products for Cre and/or internal product control (IPC) as indicated. (G) qRT-PCR analysis of *Fcer1a* (n=5/group). (H) Immunostaining of CXCL12 (red), PDGFRA (blue), and DAPI (white). The dotted lines mark dWAT layer. Scale bars, 100 μm. (I) Skin sections were stained with bodipy (green), PHA (red), and DAPI (blue). The dotted lines mark dWAT layer. Scale bars, 100 μm.

All error bars indicate mean  $\pm$  SEM. \*p < 0.05, \*\*p < 0.01, \*\*\*p < 0.001, \*\*\*\*p < 0.0001.

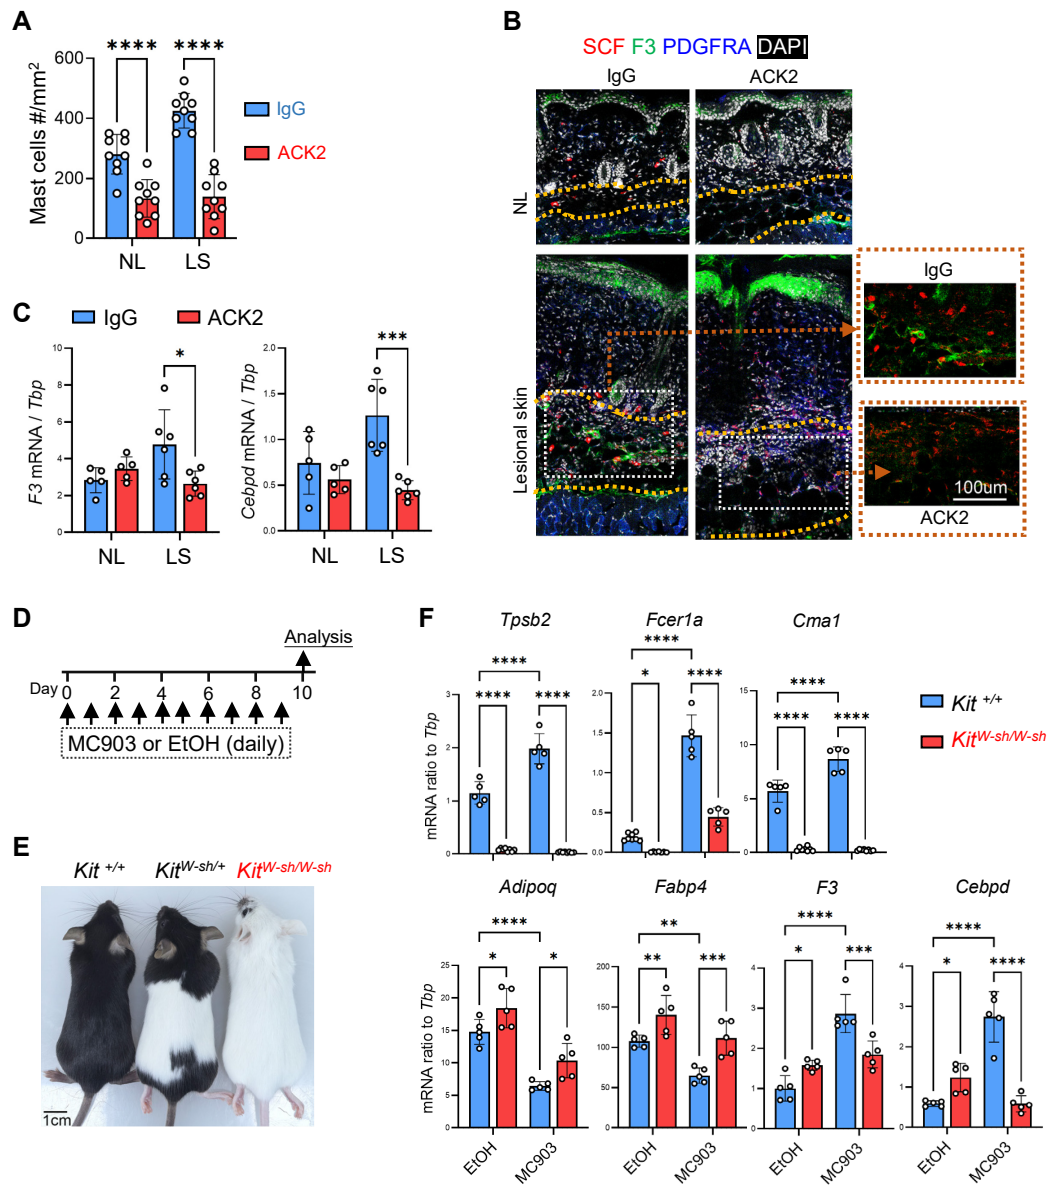

**FIGURE S5. Mast cells are required for adipocyte lipolysis, pAd activation, and dWAT fibrosis in AD**

(A-C) Anti-ACK2 antibody or rat IgG2A isotype control antibody was injected intradermal during MC903-application, and skin biopsies were collected for analysis. (A) Quantified bar graphs of Fig. 5D showing the number of MCs/mm<sup>2</sup> (n=9/group). (B) Immunostaining of SCF (red), F3 (green), PDGFRA (blue), and DAPI (white). The dotted lines mark dWAT layer. Zoom-in panels for red and green fluorescence channels are shown on the right panels. Scale bars, 100 µm. (C) qRT-PCR analysis of the listed genes in EtOH or MC903-treated skin samples (n=5-6/group).

(D-F) Wild type (WT) and *Kit*<sup>W-sh/W-sh</sup> mice were subjected to daily MC903 applications for 10 days (schematic in D). (E) Representative mouse back skin images for each genotype. (F) qRT-PCR analysis of the listed genes in EtOH or MC903-treated skin samples (n=5/group).

All error bars indicate mean  $\pm$  SEM. \*p < 0.05, \*\*p < 0.01, \*\*\*p < 0.001, \*\*\*\*p < 0.0001.



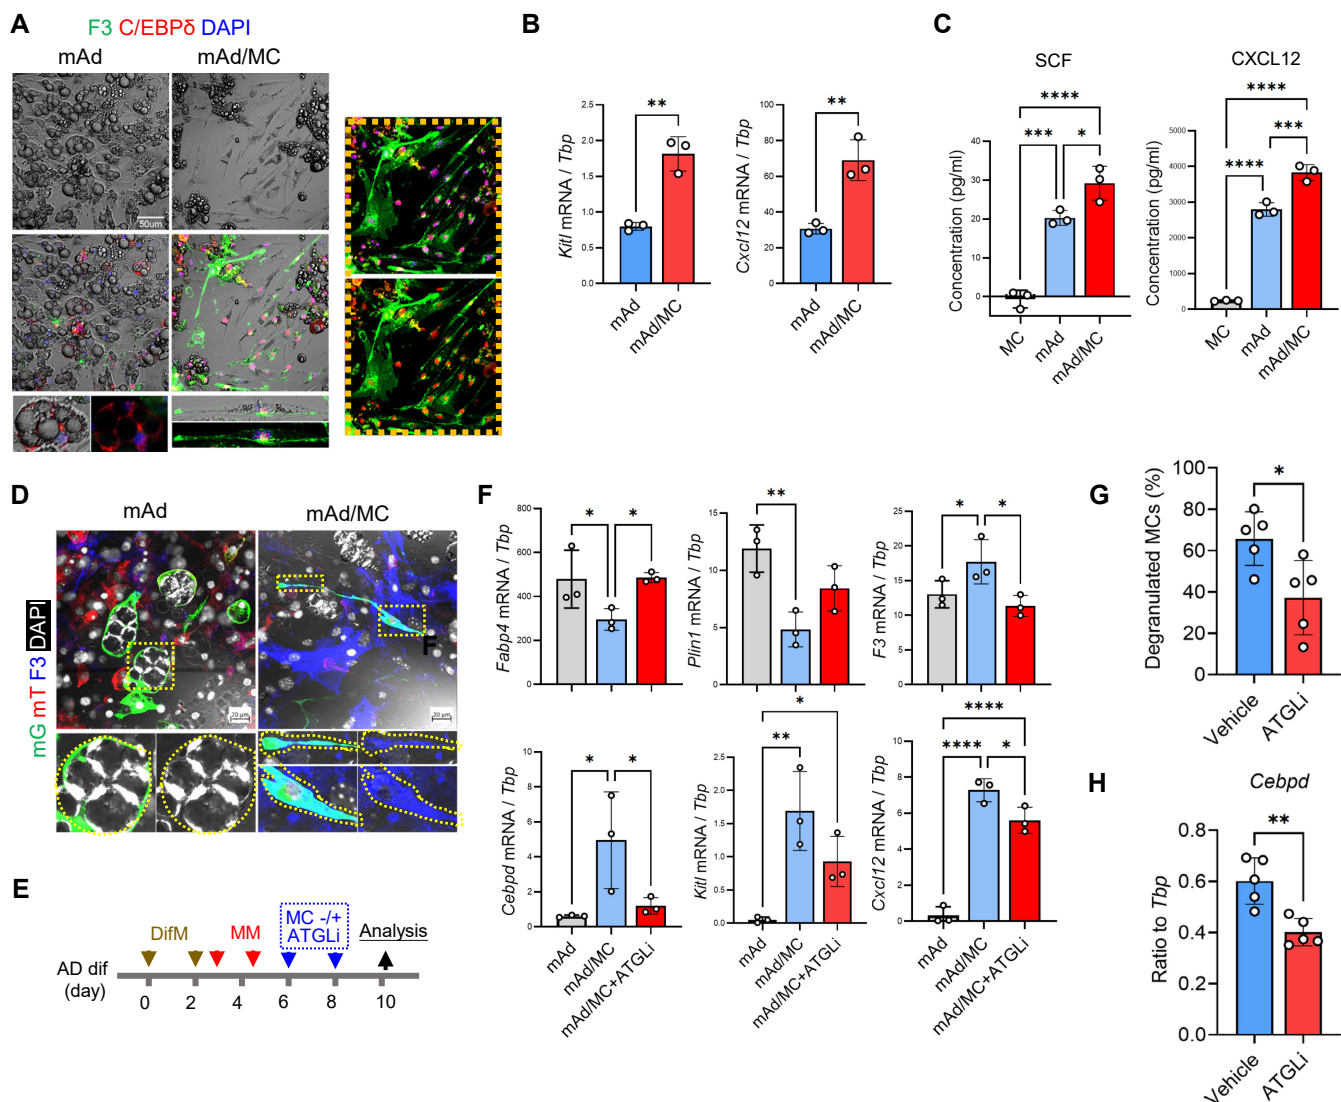

**FIGURE S6. Mast cells trigger lipolysis-dependent adipocyte-to-inflammatory pAdS trans-differentiation**

(A-C) Fully differentiated adipocytes were cocultured with MC as shown in Fig. 6A. (A) Overlaid wild-filed image and immunostaining image of F3 (green), C/EBP $\delta$  (red), DAPI (blue). Scale bars ,50  $\mu$ m. (B) qRT-PCR analysis of the indicated genes (n = 3/group). (C) ELISA analysis measuring the secreted protein concentration of SCF and CXCL12 (n=3/group).

(D) Primary neonatal dFBs isolated from Adipoq-CreERT2;mTmG mice were differentiated into mature adipocytes in the presence of TAM and then cocultured with MCs. Immunostaining with F3 antibody (blue) and DAPI (white). Scale bars, 20  $\mu$ m.

(E-F) ATGL inhibitor-pretreated mature adipocytes were co-cultured with MCs (schematic diagram in E). (F) qRT-PCR analysis of the indicated genes (n = 3/group).

(G-H) Mice were i.p. injected daily with ATGLi or vehicle during MC903 applications. (G) Quantified the results of Fig. 6K showing the number of degranulating MCs/mm<sup>2</sup> in dWAT (n=5/group). (H) qRT-PCR analysis of *Cebpd* (n = 5/group).有5个点

All error bars indicate mean  $\pm$  SEM. \*p < 0.05, \*\*p < 0.01, \*\*\*p < 0.001, \*\*\*\*p < 0.0001.

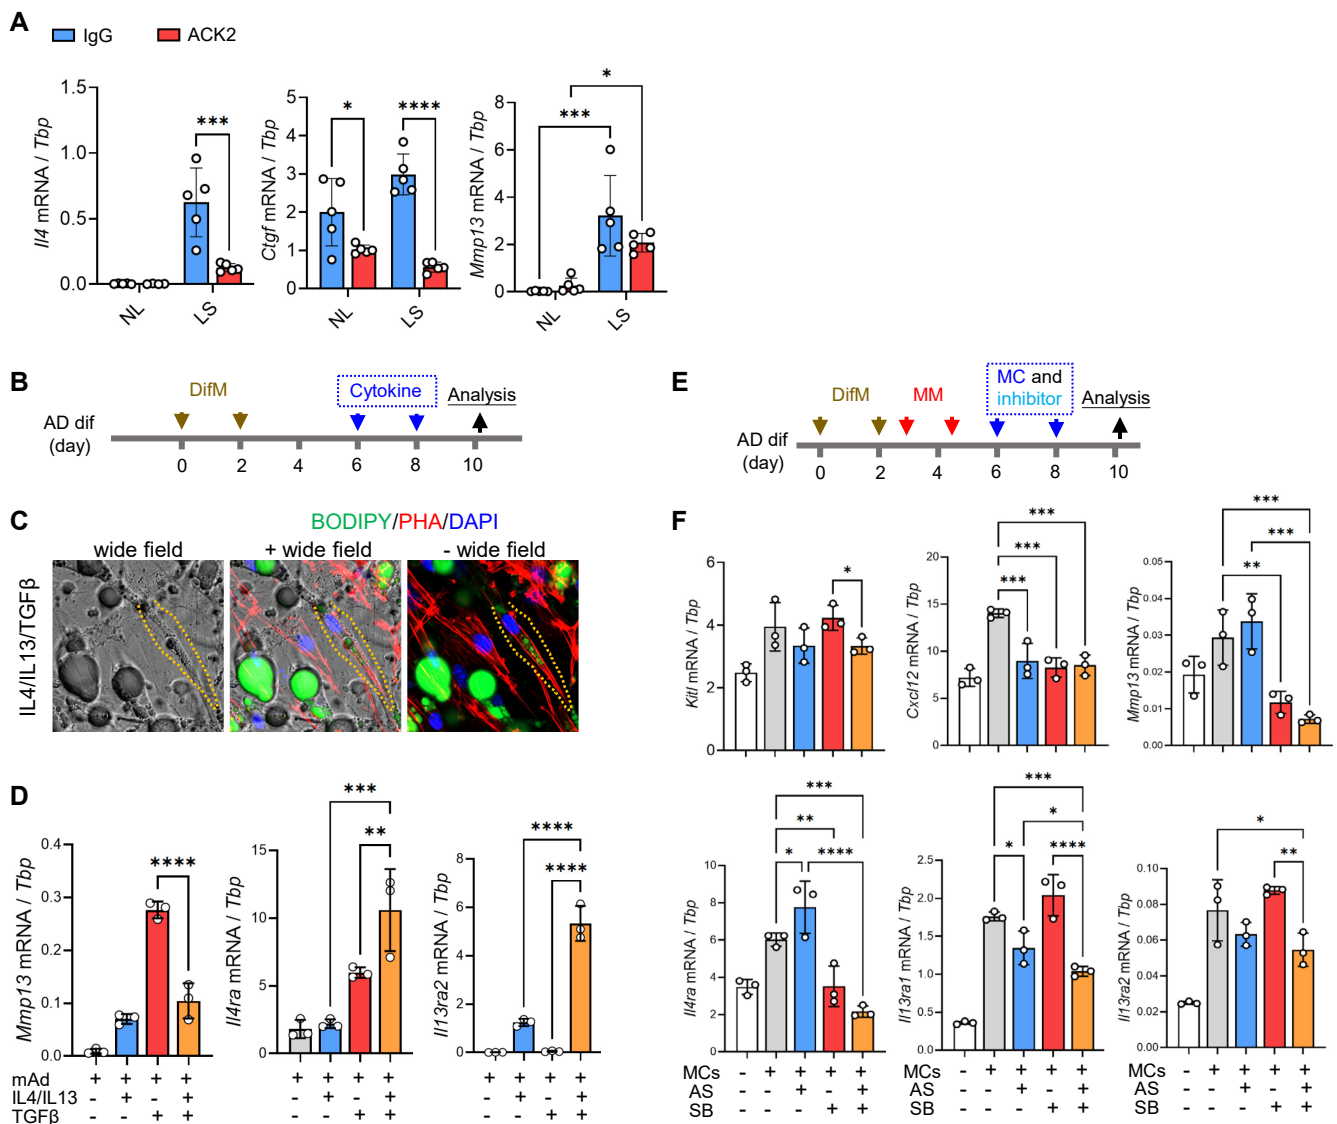

**FIGURE S7. Mast Cells Induce dWAT Fibrosis via IL-4/IL-13/TGF- $\beta$  Signaling**

(A) Anti-KIT antibody or rat IgG2A isotype control antibody was injected intradermal to mouse skin during MC903-application, and skin biopsies were collected for qRT-PCR analysis of indicated genes ( $n = 3 \sim 5/\text{group}$ ).

(B-D) Mature adipocytes were co-treated with IL4, IL13, and TGF $\beta$  for 4 days (schematic diagram in B).

(C) Wide-field images are overlaid with BODIPY (green), PHA (red) and DAPI (blue) staining images.

(D) qRT-PCR analysis of the indicated genes ( $n = 3/\text{group}$ ).

(E-F) STAT6 and/or TGFBR inhibitor-pretreated fully differentiated adipocytes were co-cultured with MCs (schematic diagram in E). (F) qRT-PCR analysis of the indicated genes ( $n = 3/\text{group}$ ).

All error bars indicate mean  $\pm$  SEM. \* $p < 0.05$ , \*\* $p < 0.01$ , \*\*\* $p < 0.001$ , \*\*\*\* $p < 0.0001$ .

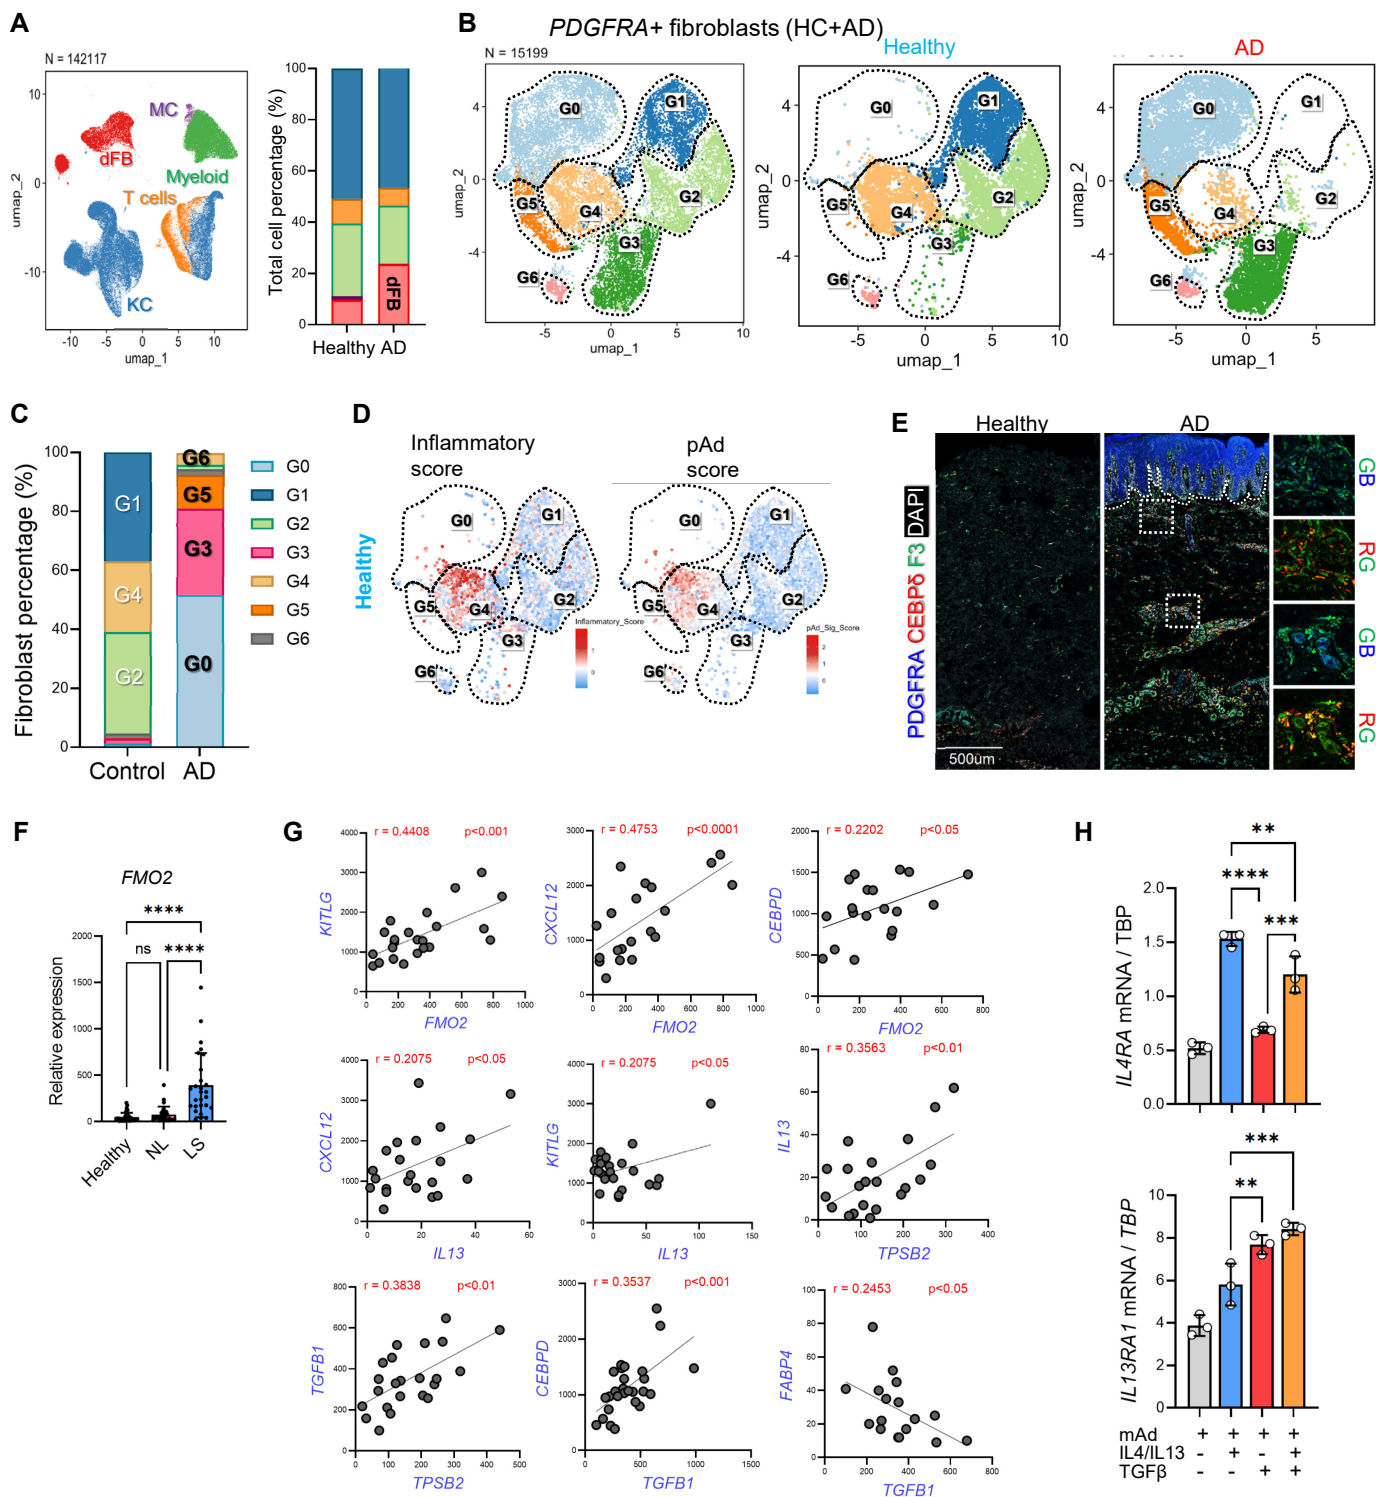

**FIGURE S8**

## FIGURE S8. Preadipocyte and Inflammatory Signature Define Inflammatory Fibroblasts in Human Atopic Dermatitis

(A-D) ScRNA-seq data of human psoriasis database (Reynolds et al., 2021). (A) UMAP plots (left) and bar graphs (right) showing cell distribution and percentage of dFB, KC, T cells, MC and myeloid cell populations in healthy and AD skin samples. (B) UMAP plots showing by clusters (left panel) or by samples (middle and right panels) distribution of 7 *PDGFRA*<sup>+</sup> dFB clusters (G0-G6) from HC and AD skin samples. (C) Bar graphs showing cell percentage of *PDGFRA*<sup>+</sup> dFB. (D) UMAP showing the distribution of preadipocytes or inflammatory signature scores in human healthy skin.

(E) Immunostaining of C/EBP $\delta$  (red), F3 (green), *PDGFRA* (blue), and DAPI (blue) in skin sections from human healthy and AD skin samples. White dotted lines separate the epidermis from the dermis. Zoom-in panels for indicated RGB channels are shown on the right. Scale bar, 500  $\mu$ m.

(F) Bar graphs showing the expression (based on RNAseq FPKM values) of *FMO2* in human healthy (healthy), non-lesional (NL) and lesional (LS) skin samples (n>30/group).

(G) Correlation expression plots of indicated genes. Linear correlation analysis was performed by Pearson correlation coefficient method. The r value represents the correlation coefficient strength, and p value assesses the statistic significance of the correlation.

(H) In vitro human adipocytes were co-treated with cytokines, including IL4, IL13, and TGF $\beta$  for 4 days. qRT-PCR analysis of the indicated genes (n = 3/group).

All error bars indicate mean  $\pm$  SEM. n.s., non-significant, \*\*p < 0.01, \*\*\*p < 0.001, \*\*\*\*p < 0.0001.

**Table S1. List of Abbreviations:**

| <b>Abbreviations</b> | <b>Definitions</b>                            |
|----------------------|-----------------------------------------------|
| AP                   | Adipocyte progenitor                          |
| Ad                   | Adipocyte                                     |
| MC903                | Calcipotriol                                  |
| AD                   | Atopic Dermatitis                             |
| HC                   | Healthy control                               |
| dWAT                 | Dermal white adipose tissue                   |
| dFB                  | Dermal fibroblast                             |
| p.t                  | Post-treatment                                |
| KC                   | Keratinocyte                                  |
| NEU                  | Neutrophil                                    |
| MC                   | Mast cell                                     |
| MAC                  | Macrophage                                    |
| RET                  | Reticular                                     |
| PAP                  | Papillary                                     |
| Inf.pAd              | Inflammatory preadipocyte                     |
| Areg                 | Adipose regulatory cell                       |
| AP                   | Adipocyte progenitor                          |
| pAd                  | Preadipocyte                                  |
| eAd                  | Early adipocyte                               |
| mAd                  | Mature adipocyte                              |
| TIFF                 | TH2-interacting fascial fibroblasts           |
| TAM                  | Tamoxifen                                     |
| NL                   | Non-lesional                                  |
| LS                   | Lesional skin                                 |
| scRNA-seq            | Single-cell RNA sequencing                    |
| UMAP                 | Uniform manifold approximation and projection |
| FACS                 | Fluorescence activated cell sorting           |
| IHC                  | Immunohistochemistry                          |
| CM                   | Conditioned medium                            |

**Table S2 List of protein and gene symbols:**

| <b>Proteins</b>                                                | <b>Protein symbols</b> | <b>Gene symbols</b> |
|----------------------------------------------------------------|------------------------|---------------------|
| Annexin A3                                                     | ANXA3                  | <i>Anxa3</i>        |
| Adiponectin                                                    | ADIPOQ                 | <i>Adipoq</i>       |
| Aggrecan core protein                                          | PGCA                   | <i>Acan</i>         |
| Arginase 1                                                     | ARG1                   | <i>Arg1</i>         |
| CD3 antigen, epsilon polypeptide                               | CD3E                   | <i>Cd3e</i>         |
| CD68, antigen                                                  | CD68                   | <i>Cd68</i>         |
| Collagen                                                       | COL                    | <i>Col</i>          |
| C-X-C motif chemokine                                          | CXCL                   | <i>Cxcl</i>         |
| C-X-C chemokine receptor                                       | CXCR                   | <i>Cxcr</i>         |
| CCAAT enhancer-binding protein delta                           | CEBPD                  | <i>Cebpd</i>        |
| Cellular retinoic acid-binding protein 1                       | CRABP1                 | <i>Crabp1</i>       |
| Dipeptidyl peptidase 4                                         | DPP4                   | <i>Dpp4</i>         |
| Ectonucleoside triphosphate diphosphohydrolase 1               | ENTPD1                 | <i>Entpd1</i>       |
| Fatty acid binding protein 4                                   | FABP4                  | <i>Fabp4</i>        |
| Fibronectin                                                    | FN1                    | <i>Fn1</i>          |
| Dimethylaniline monooxygenase [N-oxide-forming]<br>2           | FMO2                   | <i>Fmo2</i>         |
| Coagulation factor III                                         | CD142                  | <i>F3</i>           |
| Gremlin 1                                                      | GREM1                  | <i>Grem1</i>        |
| Haptoglobin                                                    | HPT                    | <i>Hp</i>           |
| Stem cell factor                                               | SCF                    | <i>Kitl</i>         |
| Interleukin 3                                                  | IL3                    | <i>Il3</i>          |
| Interleukin 4                                                  | IL4                    | <i>Il4</i>          |
| Interleukin 13                                                 | IL13                   | <i>Il13</i>         |
| Interleukin-4 receptor subunit alpha                           | IL4RA                  | <i>Il4ra</i>        |
| Interleukin-13 receptor subunit alpha-1                        | IL13R1A                | <i>Il13ra1</i>      |
| Interleukin-13 receptor subunit alpha-2                        | IL13RA2                | <i>Il13ra2</i>      |
| Matrix metalloproteinase-13                                    | MMP13                  | <i>Mmp13</i>        |
| Keratin                                                        | KRT                    | <i>Krt</i>          |
| Neutrophil gelatinase-associated lipocalin                     | NGAL                   | <i>Lcn2</i>         |
| Lipoprotein lipase                                             | LPL                    | <i>Lpl</i>          |
| Lymphocyte antigen 6A-2/6E-1                                   | LY6A                   | <i>Ly6a</i>         |
| Lymphocyte antigen 6G                                          | LY6G                   | <i>Ly6g</i>         |
| Lymphatic vessel endothelial hyaluronan receptor               | LYVE                   | <i>Lyve</i>         |
| Lymphoid enhancer-binding factor 1                             | LEF1                   | <i>Lef1</i>         |
| Lysozyme C-2                                                   | LYZ2                   | <i>Lyz2</i>         |
| Leucine-rich repeat-containing G-protein coupled<br>receptor 5 | LGR5                   | <i>Lgr5</i>         |

|                                                        |        |               |
|--------------------------------------------------------|--------|---------------|
| Stromelysin 1                                          | MMP3   | <i>Mmp3</i>   |
| Proliferation marker protein Ki-67                     | Ki67   | <i>Mki67</i>  |
| Peroxisome proliferator-activated receptor gamma       | PPARG  | <i>Pparg</i>  |
| Perilipin                                              | PLIN   | <i>Plin</i>   |
| Platelet-derived growth factor receptor alpha          | PDGFRA | <i>Pdgfra</i> |
| Prostaglandin F2-alpha receptor                        | PF2R   | <i>Ptgfr</i>  |
| Protein tyrosine phosphatase receptor type C           | CD45   | <i>Ptprc</i>  |
| Proteoglycan 4                                         | PRG4   | <i>Prg4</i>   |
| Patatin-like phospholipase domain-containing protein 2 | ATGL   | <i>Pnpla2</i> |
| Platelet/endothelial cell adhesion molecule 1          | CD31   | <i>Pecam1</i> |
| Regulator of G-protein signaling 5                     | RGS5   | <i>Rgs5</i>   |
| Serum amyloid A3                                       | SAA3   | <i>Saa3</i>   |
| Protein S100 A8                                        | S10A8  | <i>S100a8</i> |
| Sphingomyelin phosphodiesterase 3                      | NSMA2  | <i>Smpd3</i>  |
| secreted frizzled-related protein 2                    | SFRP2  | <i>Sfrp2</i>  |
| Transforming growth factor beta                        | TGFB   | <i>Tgfb</i>   |
| Zinc finger transcription factor Trps1                 | TRPS1  | <i>Trps1</i>  |
| Tenascin C                                             | TNC    | <i>Tnc</i>    |
| vimentin                                               | VIM    | <i>Vim</i>    |
| mRNA decay activator protein ZFP36                     | TTP    | <i>Zfp36</i>  |
| Tyrosine-protein kinase Kit                            | CD117  | <i>Kit</i>    |
| Tryptase beta-2                                        | TPSB2  | <i>Tpsb2</i>  |

**Table S3.** List of primers used for qRT-PCR of mouse genes: (related to experimental procedure “Quantitative reverse transcription-quantitative PCR (qRT-PCR) analyses”). Gene symbols and forward and reverse primer sequences for each gene are shown in the table below.

| Gene name      | Strand  | Primer sequence          |
|----------------|---------|--------------------------|
| <i>Tbp</i>     | Forward | CCTTGTACCCTTCACCAATGAC   |
|                | Reverse | ACAGCCAAGATTACGGTAGA     |
| <i>Pdgfra</i>  | Forward | ATGAGAGTGAGATCGAAGGCA    |
|                | Reverse | CGGCAAGGTATGATGGCAGAG    |
| <i>Ly6a</i>    | Forward | GAGGCAGCAGTTATTGTGGAT    |
|                | Reverse | CGTTGACCTTAGTACCCAGGA    |
| <i>Pparg2</i>  | Forward | TCGCTGATGCACTGCCTATG     |
|                | Reverse | GAGAGGTCCACAGAGCTGATT    |
| <i>Adipoq</i>  | Forward | CACACCAGGCCGTGATGGCA     |
|                | Reverse | GAAGCCCCGTGGCCCTTCAG     |
| <i>Plin1</i>   | Forward | CTGTGTGCAATGCCTATGAGA    |
|                | Reverse | CTGGAGGGTATTGAAGAGCCG    |
| <i>Fabp4</i>   | Forward | GTGGGAGTGGGCTTTGCCACA    |
|                | Reverse | CACCAGGGCCCCGCCATCTA     |
| <i>Cd24a</i>   | Forward | TTCTGGCACTGCTCCTACC      |
|                | Reverse | GCGTTACTTGGATTTGGGGAA    |
| <i>Dpp4</i>    | Forward | TATGCCCAGTTTAACGACACAG   |
|                | Reverse | ACAGTTGGATTACAGCTCCT     |
| <i>Cebpd</i>   | Forward | CAGCGCCTACATTGACTCCA     |
|                | Reverse | GTTGAAGAGGTCGGCGAAGA     |
| <i>F3</i>      | Forward | GCCATTTACAAACGCCCCAA     |
|                | Reverse | GCAGGGTGAGGAATGTACCA     |
| <i>Fmo2</i>    | Forward | CTGCCACTCAAGTCATTCCCA    |
|                | Reverse | GCCATCTTCAGAGATTCTGACTCA |
| <i>Cxcl12</i>  | Forward | TGCATCAGTGACGGTAAACCA    |
|                | Reverse | TTCTTCAGCCGTGCAACAATC    |
| <i>Tgfb1</i>   | Forward | GAGCCCGAAGCGGACTACTA     |
|                | Reverse | TGGTTTTCTCATAGATGGCGTTG  |
| <i>Il4</i>     | Forward | GTACCAGGAGCCATATCCACG    |
|                | Reverse | CACCTTGGAAGCCCTACAGAC    |
| <i>Il13</i>    | Forward | TGCTTGCCTTGGTGGTCTCGC    |
|                | Reverse | GCGGCCAGGTCCCACTCCA      |
| <i>Il4ra</i>   | Forward | TCTGCATCCCGTTGTTTTGC     |
|                | Reverse | GCACCTGTGCATCCTGAATG     |
| <i>Il13ra1</i> | Forward | AGAAGCCTAGCCCTTTGGTG     |
|                | Reverse | GGGAGCCAGGAACACTTCAT     |
| <i>Il13ra2</i> | Forward | TGGCAGTATTTGGTCTGCTCT    |



|               |         |                         |
|---------------|---------|-------------------------|
|               | Reverse | CAAGCCCTCATACCAGAAAAACA |
| <i>Cxcr4</i>  | Forward | GACTGGCATAGTCGGCAATG    |
|               | Reverse | AGAAGGGGAGTGTGATGACAAA  |
| <i>Mmp13</i>  | Forward | CTATCCCTTGATGCCATTACCAG |
|               | Reverse | ATCCACATGGTTGGGAAGTTC   |
| <i>Ctgf</i>   | Forward | GGGCCTCTTCTGCGATTTTC    |
|               | Reverse | ATCCAGGCAAGTGCATTGGTA   |
| <i>Kitl</i>   | Forward | GAATCTCCGAAGAGGCCAGAA   |
|               | Reverse | GCTGCAACAGGGGGTAACAT    |
| <i>Tpsb2</i>  | Forward | CGGAGGTTCTCTCATCCATCC   |
|               | Reverse | GCCGTGTAATAGTGGGGGTG    |
| <i>cKit</i>   | Forward | GGCCTCACGAGTTCTATTTACG  |
|               | Reverse | GGGGAGAGATTTCCCATCACAC  |
| <i>Cma1</i>   | Forward | CACGGAGTGCATACCACACT    |
|               | Reverse | AAGCTTCTGCCACGTGTCTT    |
| <i>Tgfb</i>   | Forward | CAGTGGGAAGACCCACATC     |
|               | Reverse | TGTAAAGAGGGCGAAGGCAG    |
| <i>Fcer1a</i> | Forward | GAGTGCCACCGTTCAAGACA    |
|               | Reverse | GTAGATCACCTTGCGGACATTC  |

**Table S4.** List of primers used for qRT-PCR of human genes: (related to experimental procedure “Quantitative reverse transcription-quantitative PCR (qRT-PCR) analyses”). Gene symbols and forward and reverse primer sequences for each gene are shown in the table below.

| Gene name      | Strand  | Primer sequence         |
|----------------|---------|-------------------------|
| <i>TBP</i>     | Forward | CCCGAAACGCCGAATATAATCC  |
|                | Reverse | AATCAGTGCCGTGGTTCGTG    |
| <i>FABP4</i>   | Forward | ACTGGGCCAGGAATTTGACG    |
|                | Reverse | CTCGTGGAAGTGACGCCTT     |
| <i>CEBPD</i>   | Forward | CCATGTACGACGACGAGAGC    |
|                | Reverse | TTGCTGTTGAAGAGGTCCGC    |
| <i>F3</i>      | Forward | TCGCTGATGCACTGCCTATG    |
|                | Reverse | GAGAGGTCCACAGAGCTGATT   |
| <i>ADIPOQ</i>  | Forward | AGGAAACCACGACTCAAGGG    |
|                | Reverse | TCCGGTTTCACCGATGTCTC    |
| <i>KITLG</i>   | Forward | AATCCTCTCGTCAAACTGAAGG  |
|                | Reverse | CCATCTCGCTTATCCAACAATGA |
| <i>IL4RA</i>   | Forward | ACCTGCGTCTCCGACTACA     |
|                | Reverse | TTATCCGCACTGACCACGTC    |
| <i>IL13RA1</i> | Forward | TGAGTGTCTCTGTTGAAAACCTC |
|                | Reverse | GGGGTACTTCTATTGAACGACGA |
| <i>IL13RA2</i> | Forward | ACCTGGCATAGGTGTACTTCT   |
|                | Reverse | CCAAATAGGGAAATCTGCATCCT |
| <i>CXCL12</i>  | Forward | ATTCTCAACACTCCAAACTGTGC |
|                | Reverse | ACTTTAGCTTCGGGTCAATGC   |
| <i>PPARG</i>   | Forward | ACCAAAGTGCAATCAAAGTGGA  |
|                | Reverse | ATGAGGGAGTTGGAAGGCTCT   |
